# Supplementary material for: Glycogen synthase kinase 3 activity enhances liver inflammation in MASH
Source: PubMed Central journal article supplement — JHEP Rep. 2024 Mar 26;6(6):101073. doi: 10.1016/j.jhepr.2024.101073 (PMC11179260; doi:10.1016/j.jhepr.2024.101073), 2024-03-26

Fig. 1F Top panel

Primary human liver sinusoidal endothelial cells

PA (hr) 0 2 4

N1

Re-run

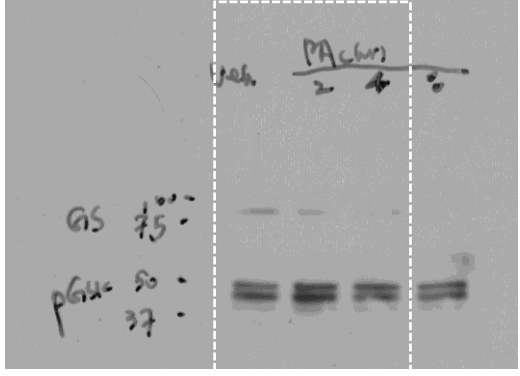

p-GSK3α/β<sup>Y279/216</sup>

Re-run

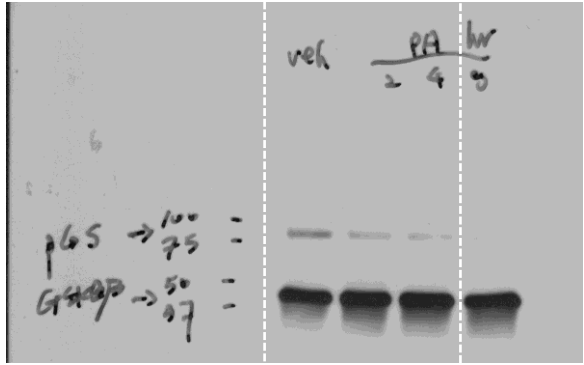

GSK3β

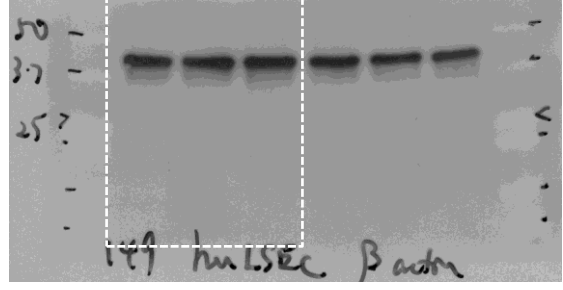

B-actin

Primary human liver sinusoidal endothelial cells

PA (hr) 0 2 4

N2

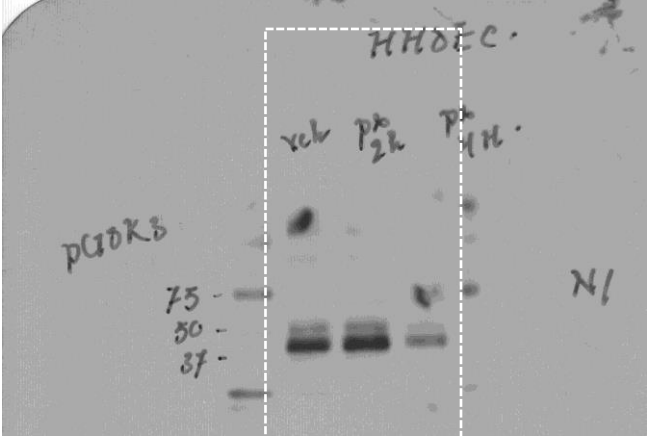

p-GSK3α/β<sup>Y279/216</sup>

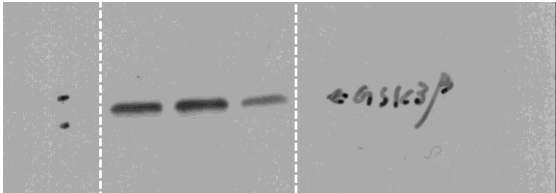

GSK3β

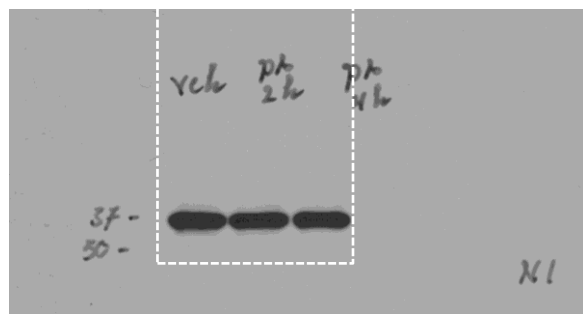

GAPDH

Fig. 1F Top panel

Primary human liver sinusoidal endothelial cells

N3

PA (hr) 0 2 4

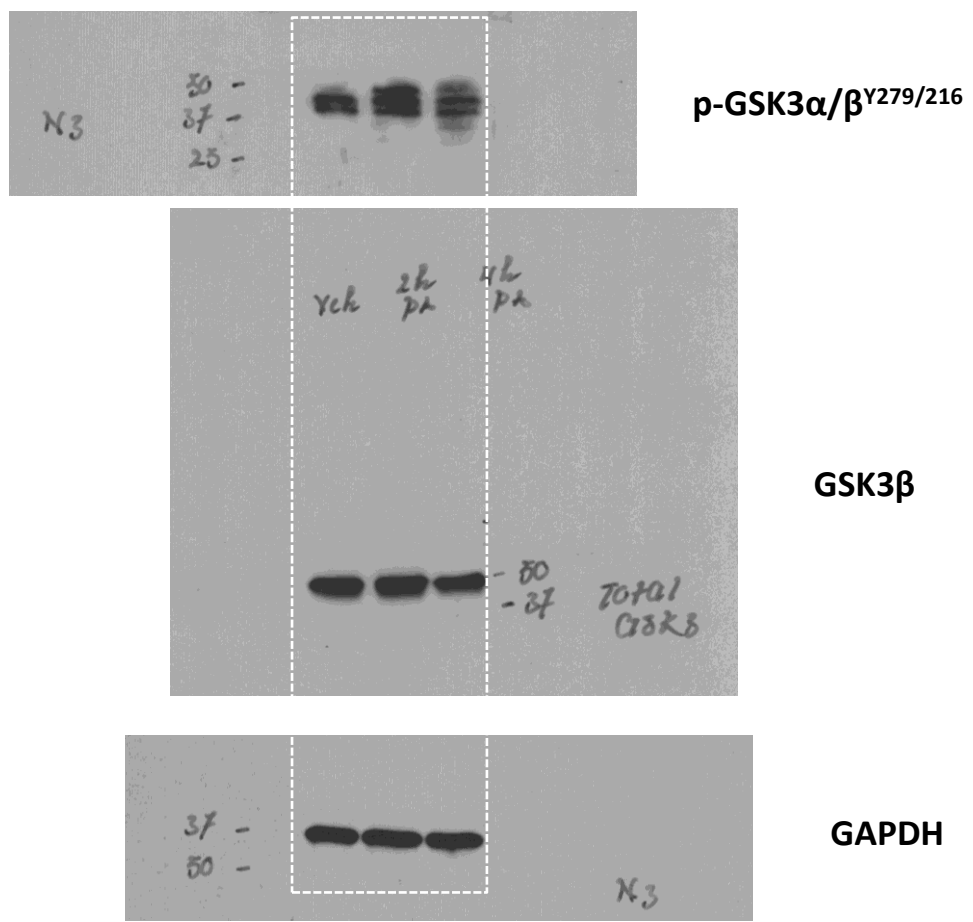

Fig. 1F Bottom panel

Primary human liver  
sinusoidal endothelial cells

LY (nM) 0 0 20 100  
PA - + + +

N1

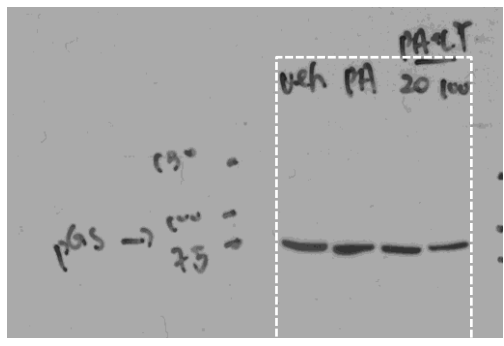

p-GS(s641)

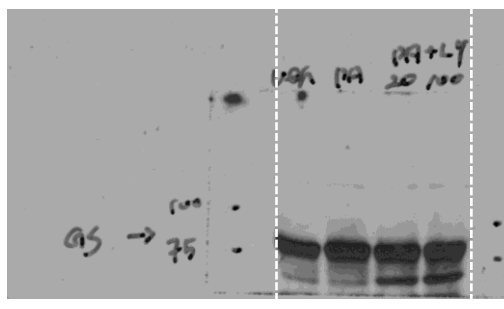

GS

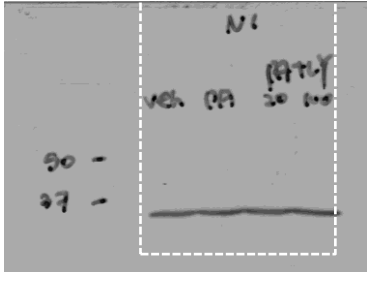

GAPDH

N2

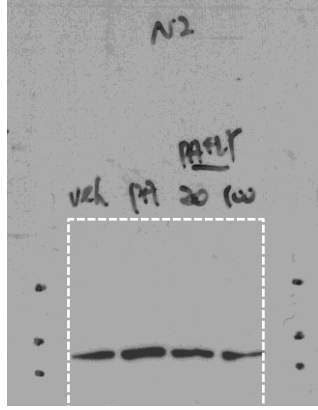

p-GS(s641)

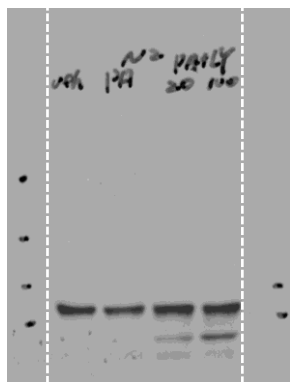

GS

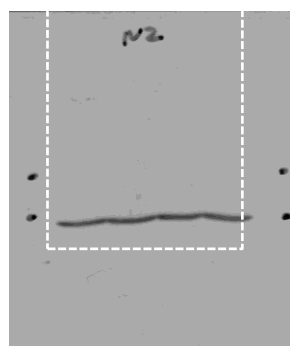

GAPDH

Fig. 1F Bottom panel

N3

Primary human liver sinusoidal endothelial cells

|         |   |   |    |     |
|---------|---|---|----|-----|
| LY (nM) | 0 | 0 | 20 | 100 |
| PA      | - | + | +  | +   |

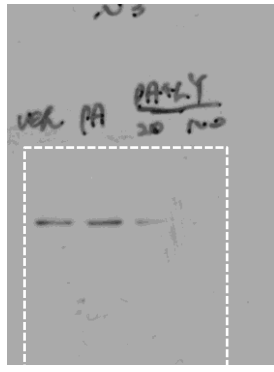

p-GS(s641)

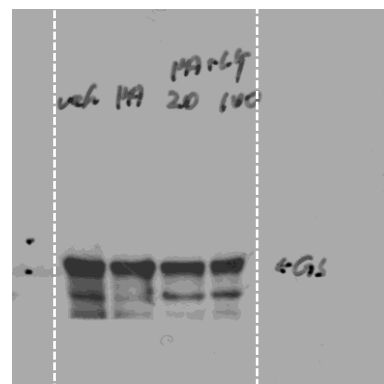

GS

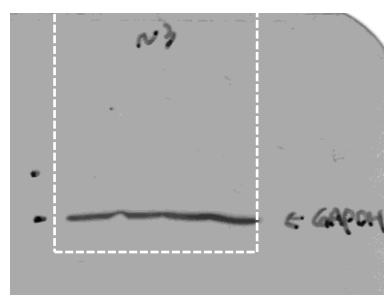

GAPDH

**Fig. 1G Left panel**

Mouse liver sinusoidal  
endothelial cell line

LY (nM) - - +  
PA - + +

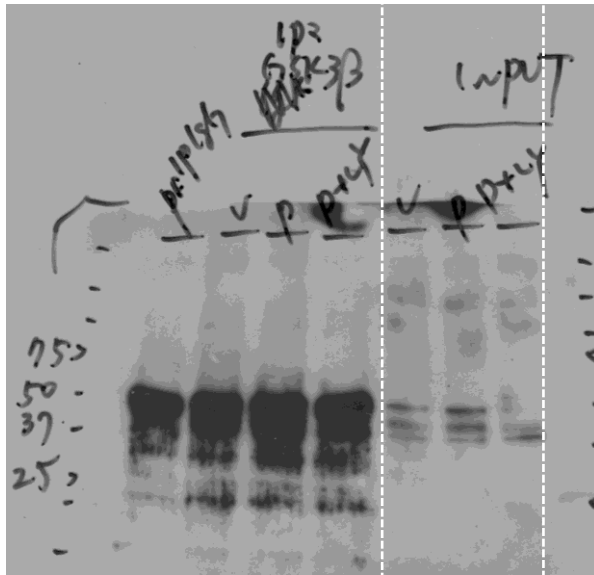

p-GSK3 $\alpha/\beta$ <sup>Y279/216</sup>

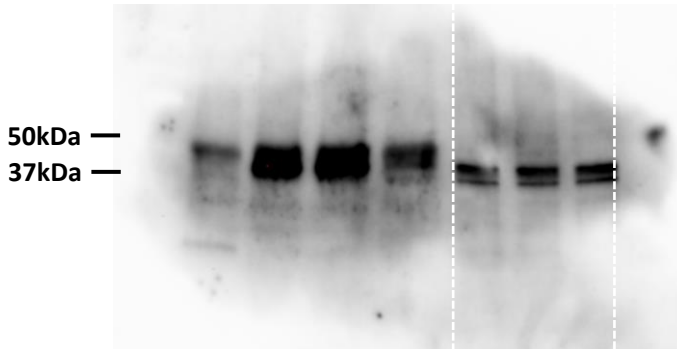

GSK3 $\beta$

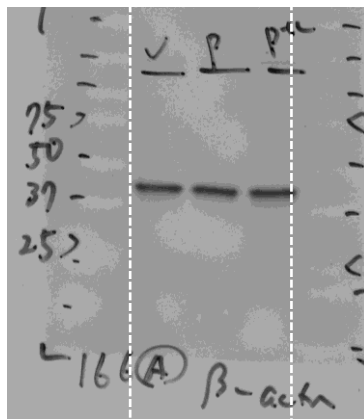

B-actin

**Fig. 1G Right panel**

PA - +

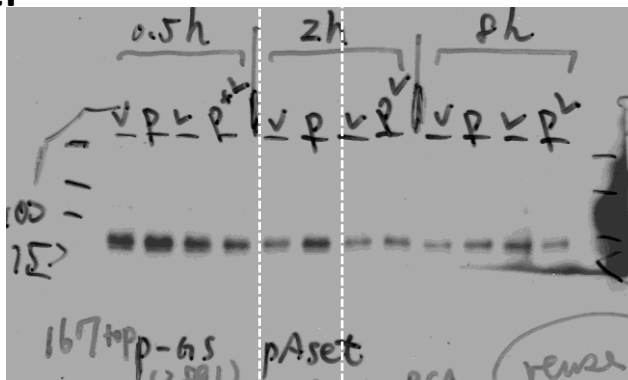

p-GS

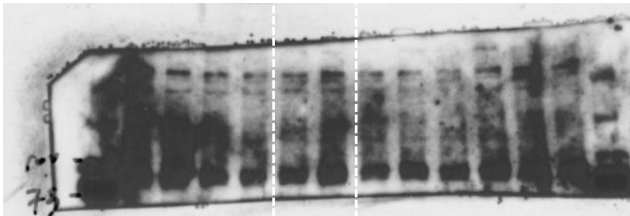

GS

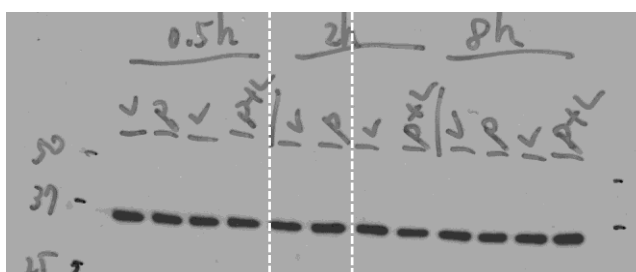

GAPDH

Fig. 1G Left panel

Mouse liver sinusoidal  
endothelial cell line

LY (nM) - - +  
PA - + +

N1

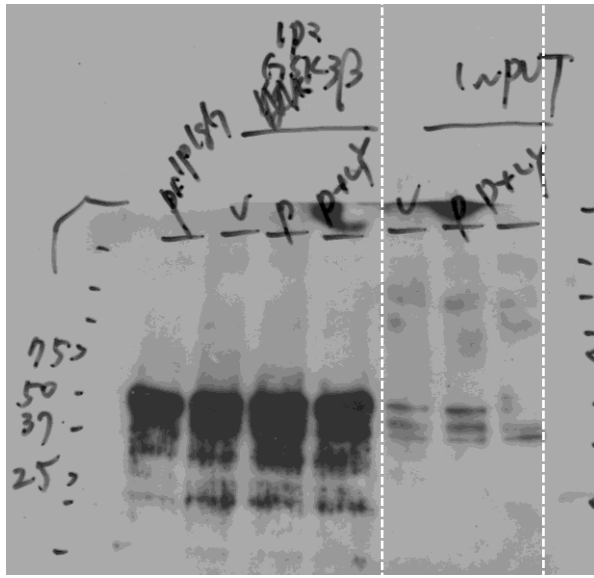

p-GSK3 $\alpha/\beta$ <sup>Y279/216</sup>

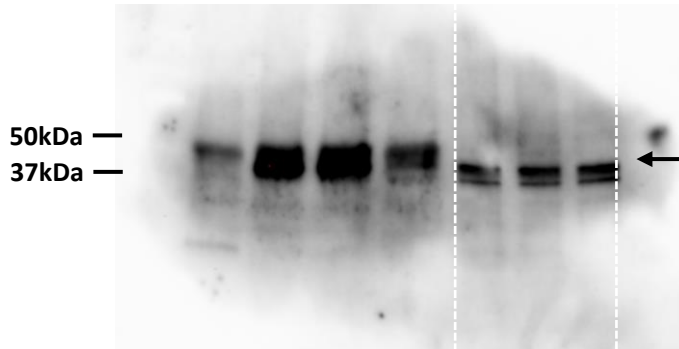

GSK3 $\beta$



$\beta$ -actin

Figure 1 G left panel

N2

Mouse liver sinusoidal endothelial cell line

|         |   |   |   |
|---------|---|---|---|
| LY (nM) | - | - | + |
| PA      | - | + | + |

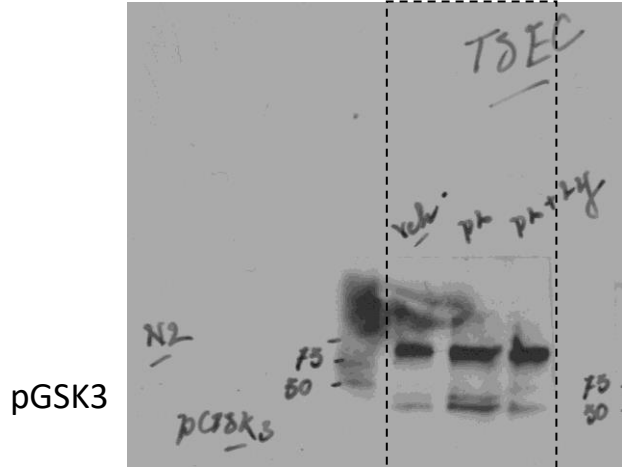

GSK3

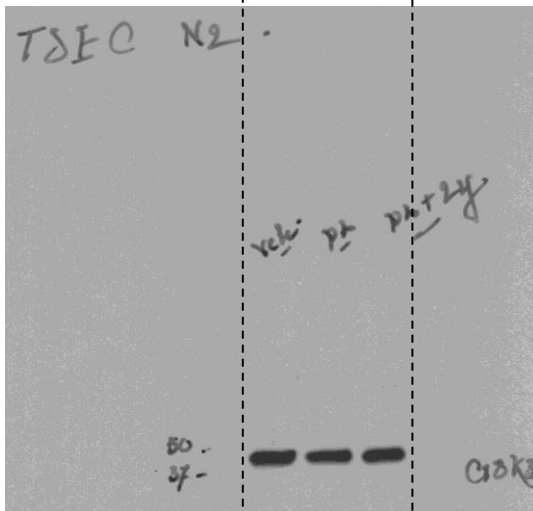

GAPDH

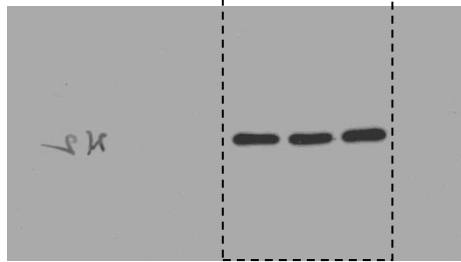

Figure 1 G left panel

N3

Mouse liver sinusoidal endothelial cell line

| LY (nM) | - | - | + |
|---------|---|---|---|
| PA      | - | + | + |

pGSK3

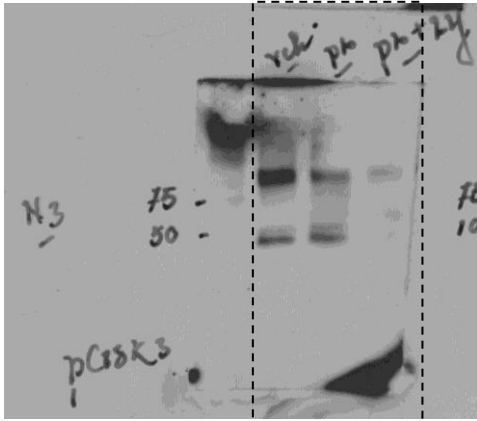

GSK3

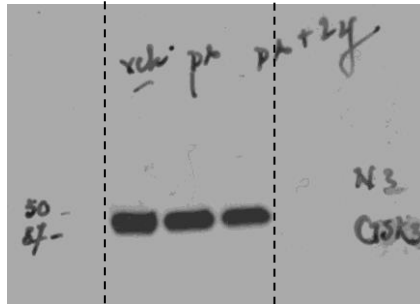

GAPDH

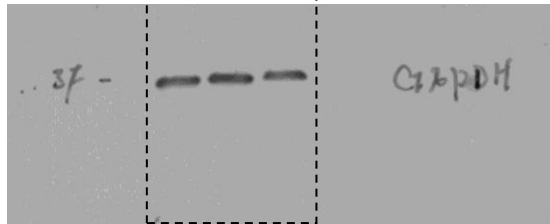



Figure 1 G right panel

N1

Mouse liver sinusoidal endothelial cell line

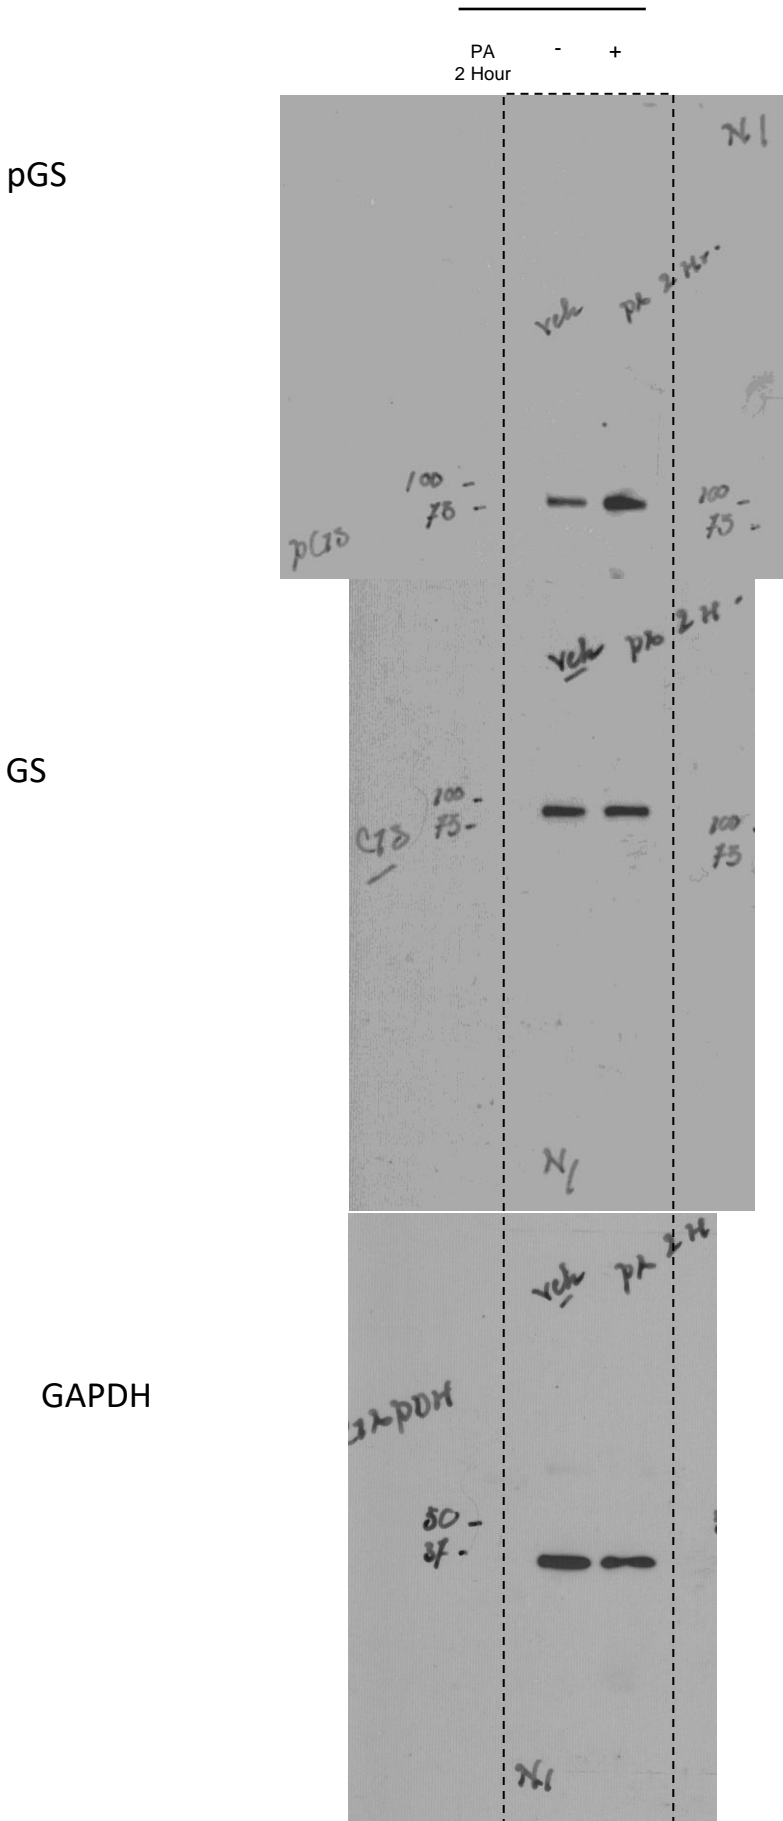

Figure 1 G right panel

N2

Mouse liver sinusoidal endothelial cell line

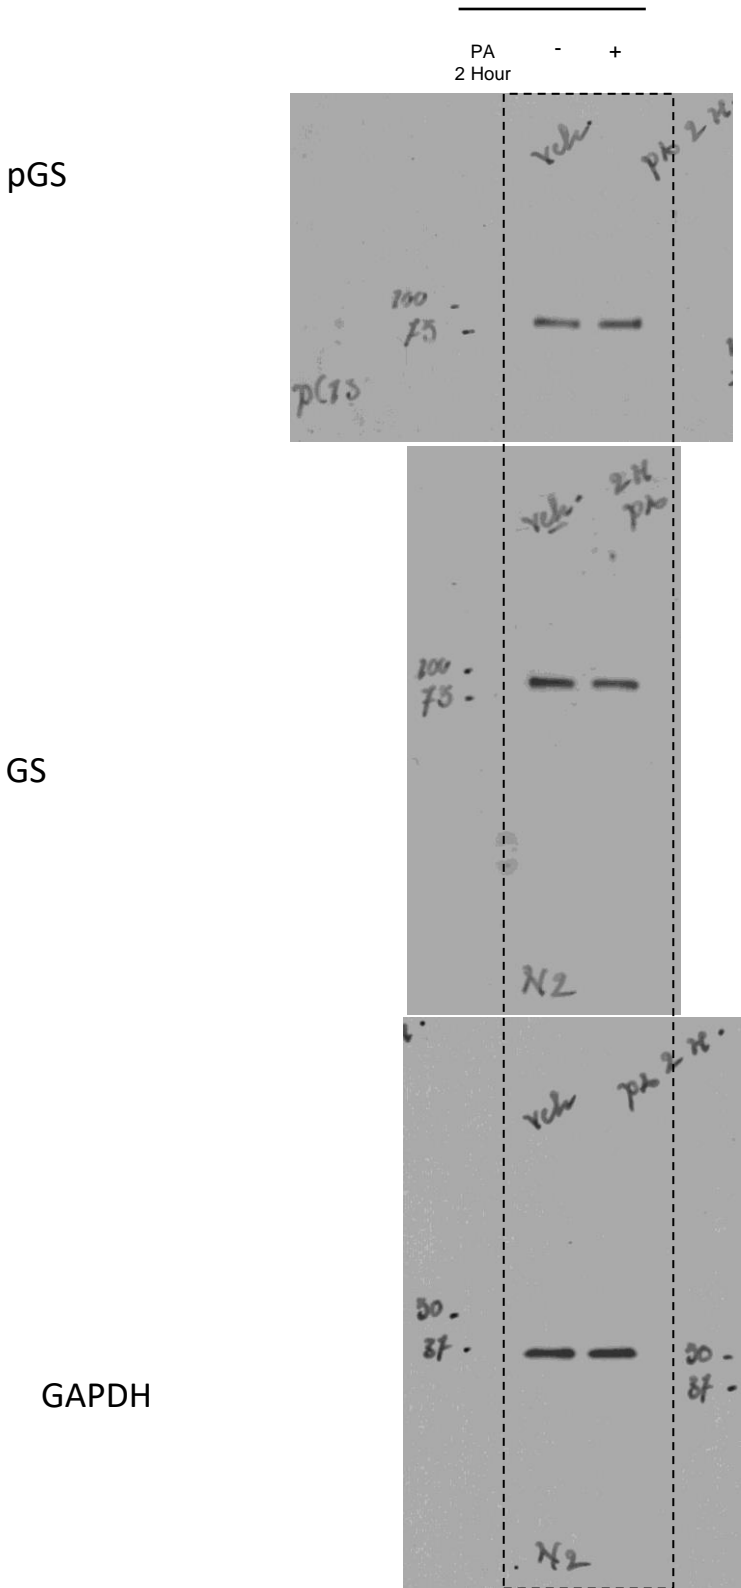

Figure 1 G right panel

N3

Mouse liver sinusoidal endothelial cell line

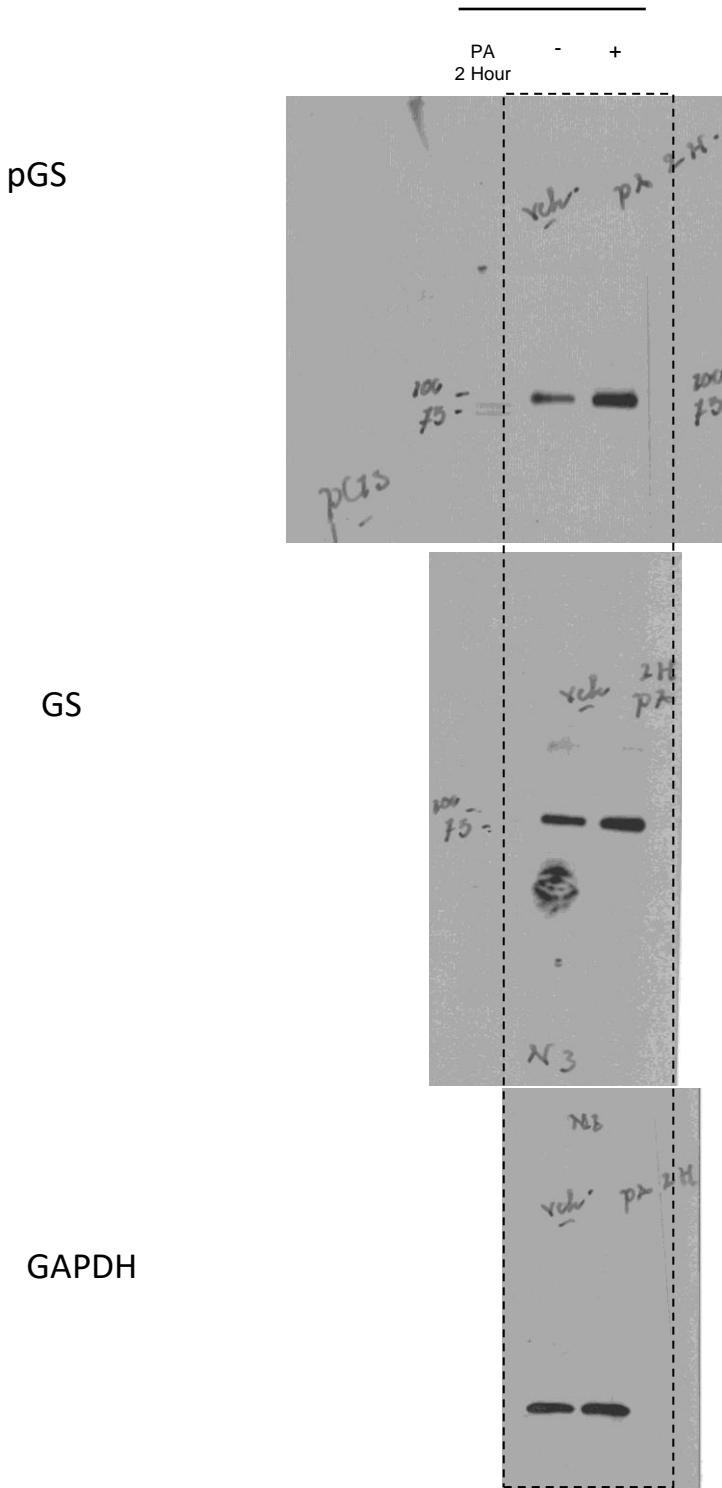

Fig. 1H Left panel

Mouse liver sinusoidal  
endothelial cell line

30min

LPC - +

N1

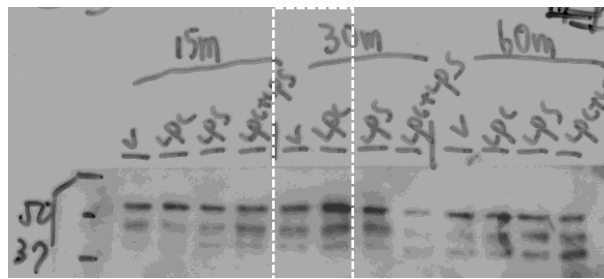

p-GSK3α/β<sup>Y279/216</sup>

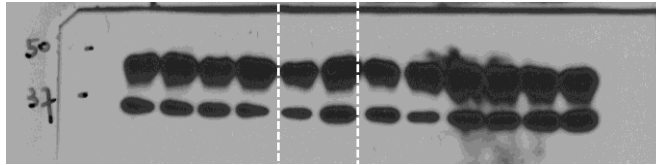

GSK3β

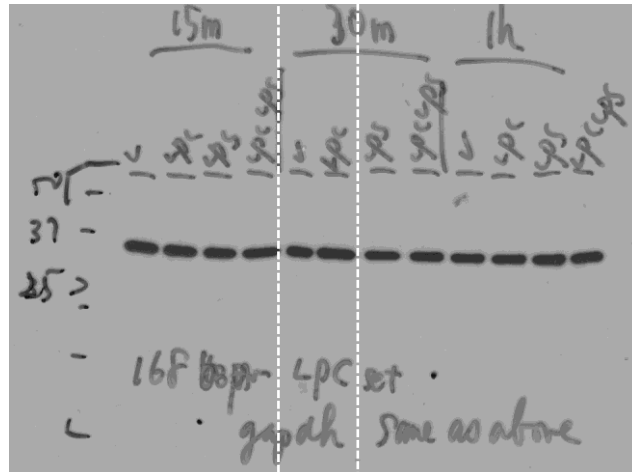

GAPDH

Figure 1 H Left panel

N2

Mouse liver sinusoidal endothelial cell line

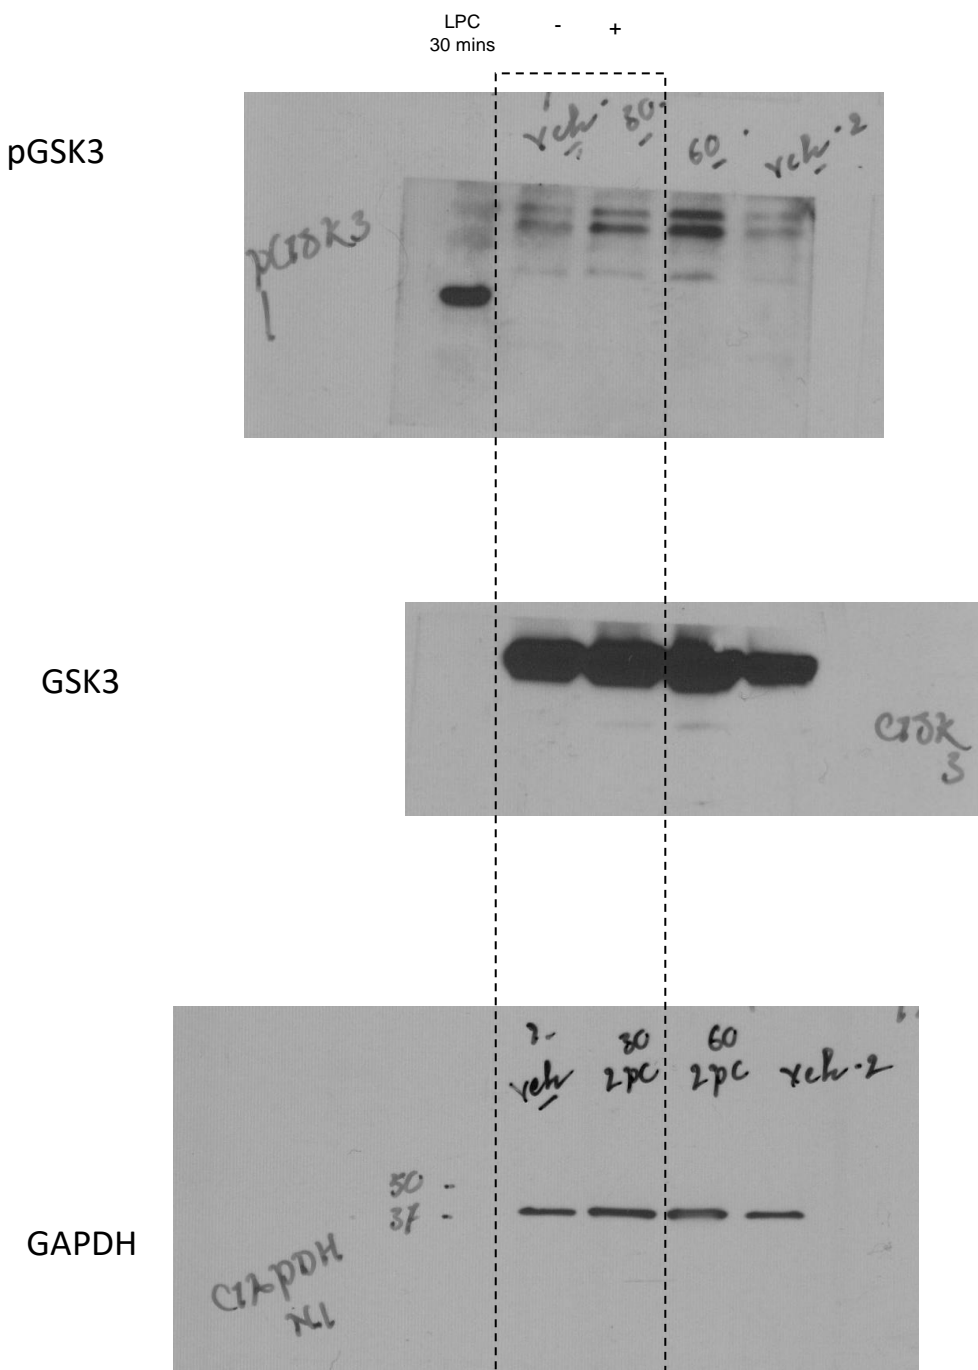

Figure 1 H Left panel

N3

Mouse liver sinusoidal endothelial cell line

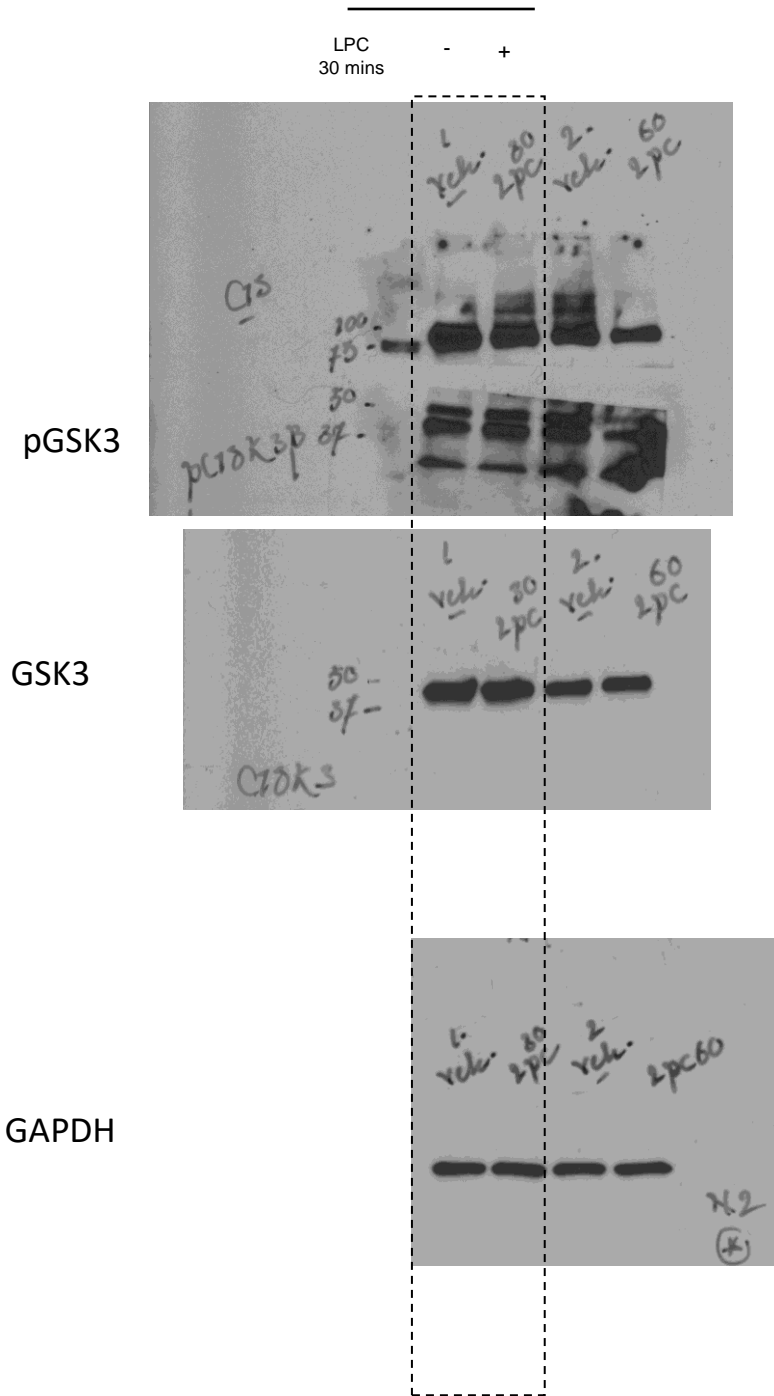

**Figure 1 H Right panel**

**N1**

Mouse liver sinusoidal endothelial cell line

60 min

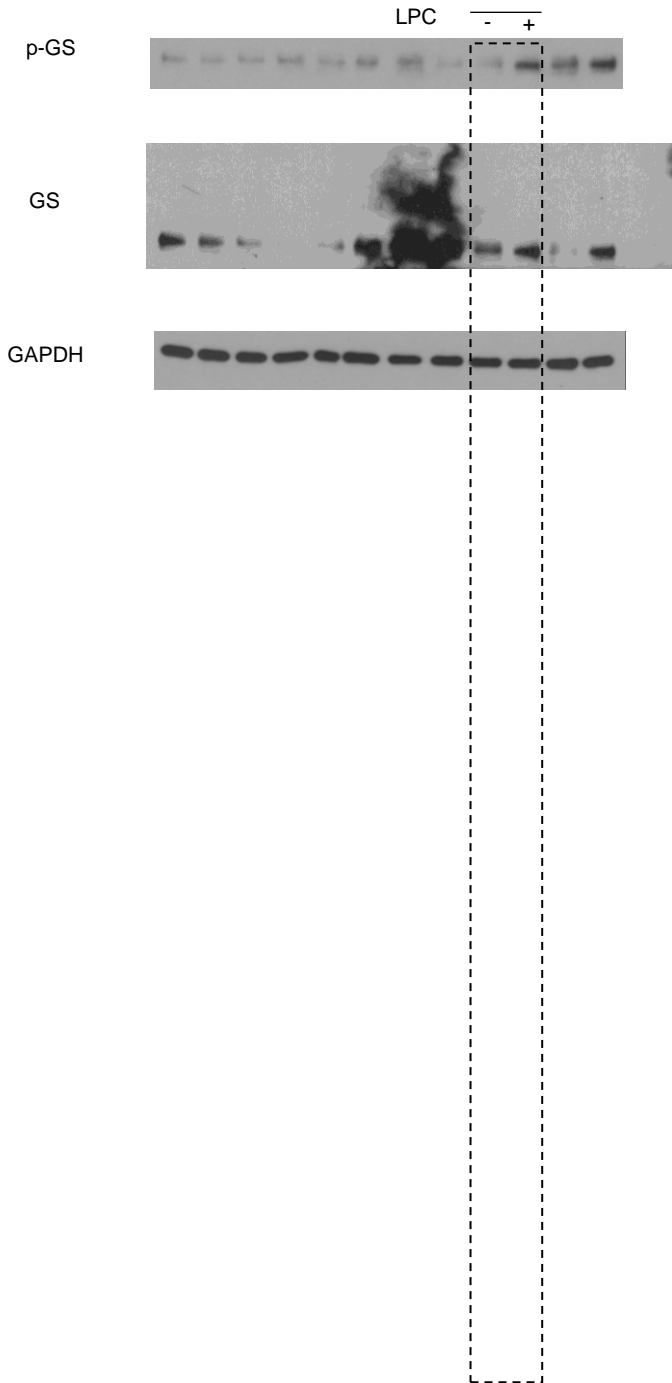

Figure 1 H Right panel

N2

Mouse liver sinusoidal endothelial cell line

LPC - +  
60 mins

pGS

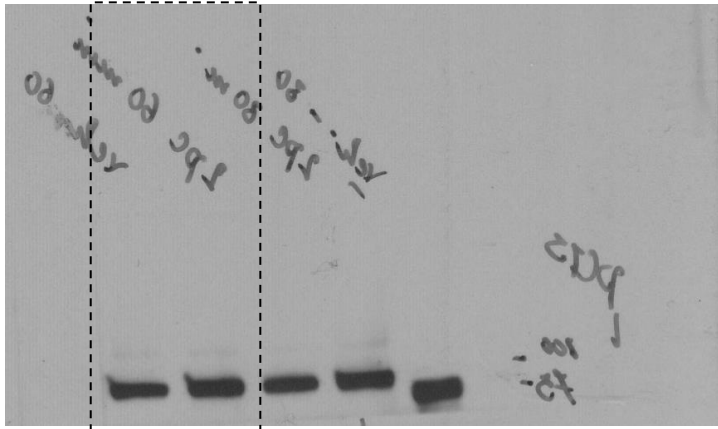

GS

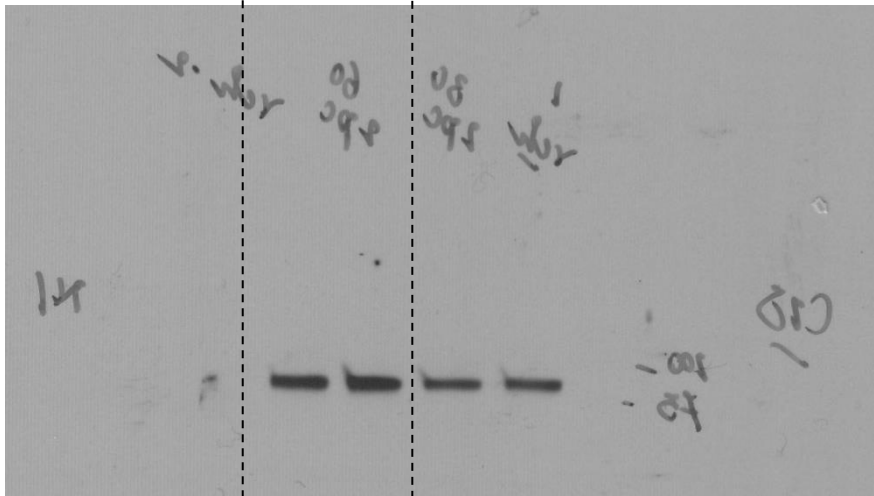

GAPDH

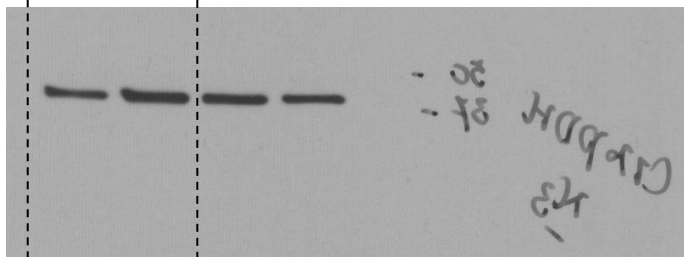



Figure 1 H Right panel

N3

Mouse liver sinusoidal endothelial cell line

LPC - +  
60 mins

pGS

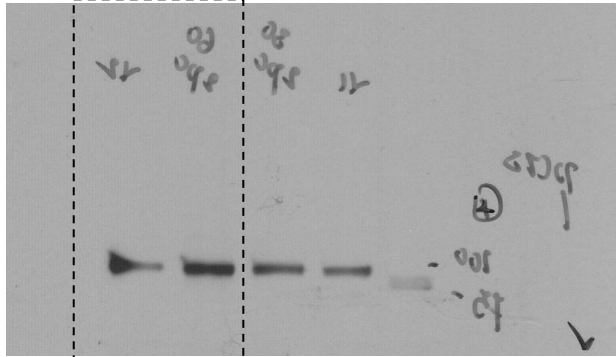

GS

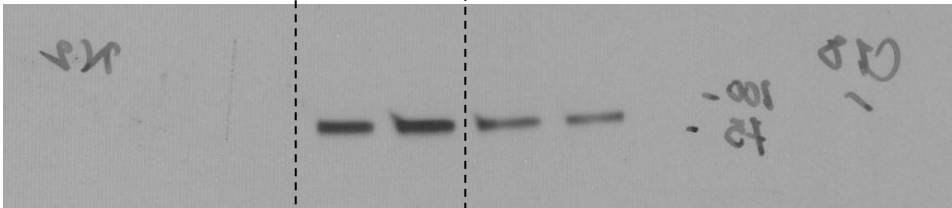

GAPDH

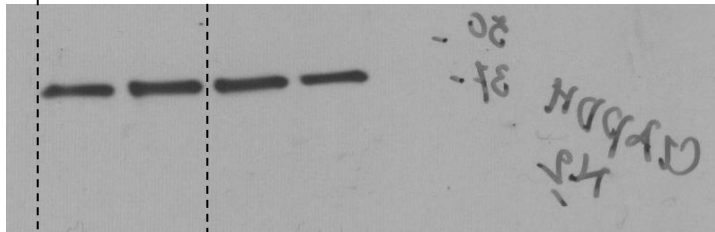

Figure 1 H Right panel

N4

Mouse liver sinusoidal endothelial cell line

LPC  
60 mins      -      +

pGS

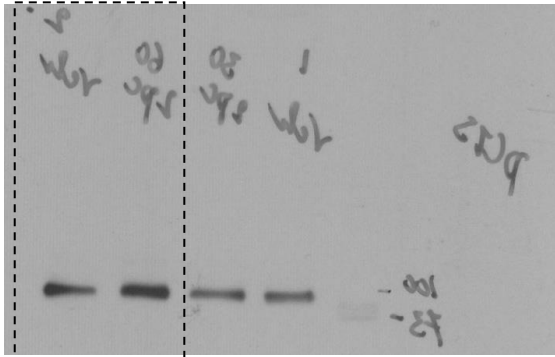

GS

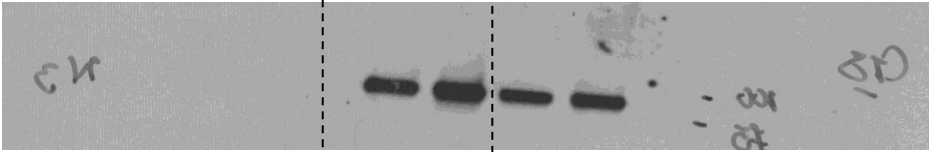

GAPDH

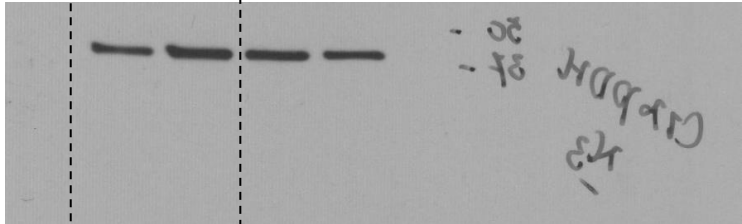

(Not included)  
Fig. 2E Normal

Normal Steatosis MASH F0-F4  
x1 x4 x4 x8

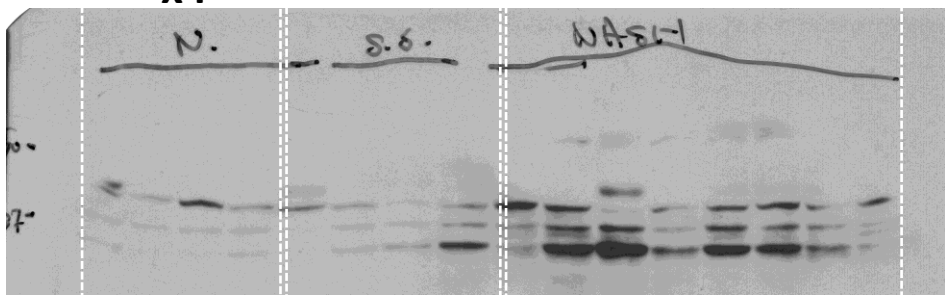

p-GSK3β<sup>Y279/216</sup>

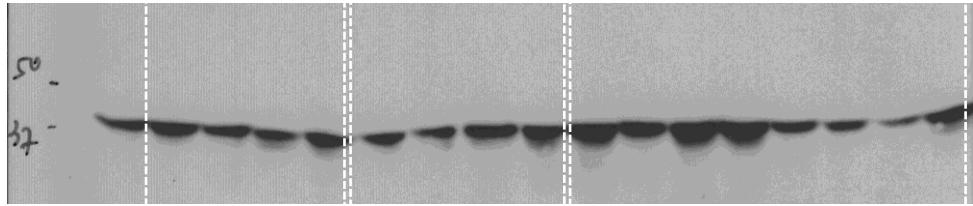

GSK3β

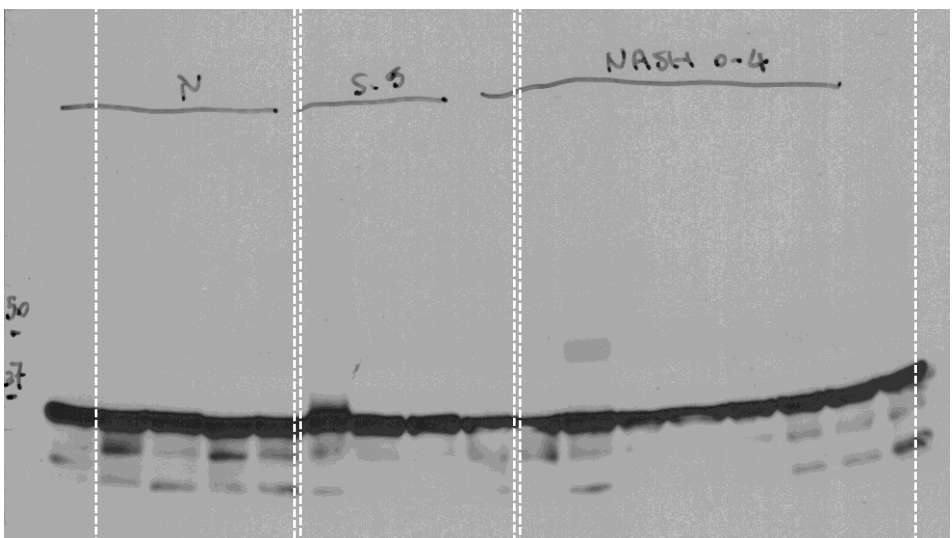

GAPDH

Fig. 3B

Primary human liver sinusoidal endothelial cells

LY (nM) 0 0 20 100  
PA - + + +

N1

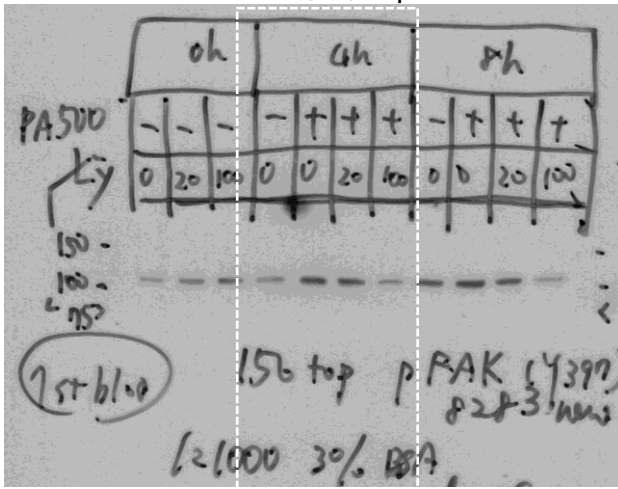

p-FAK (Y397)

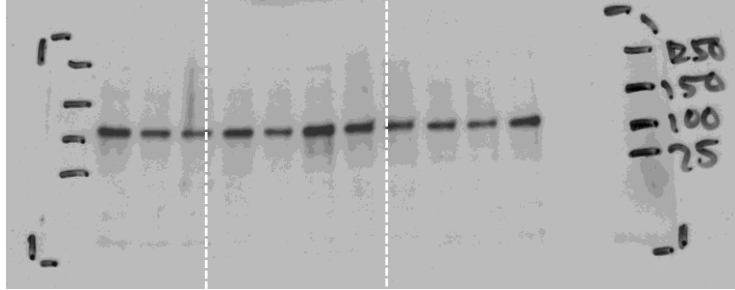

FAK

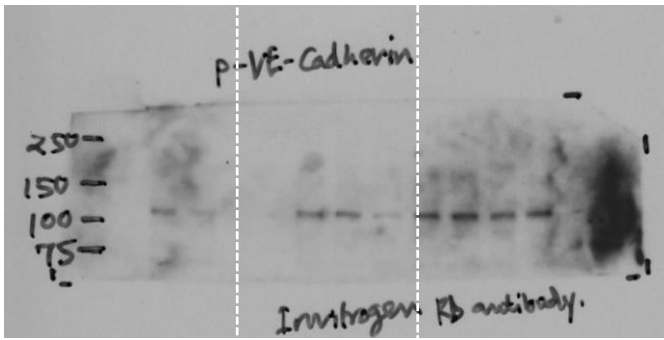

p-VE-Cad  
(Y658)

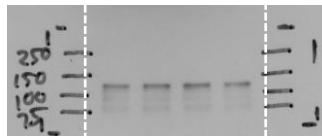

VE-Cad  
Re-run with only 4  
samples by SI.

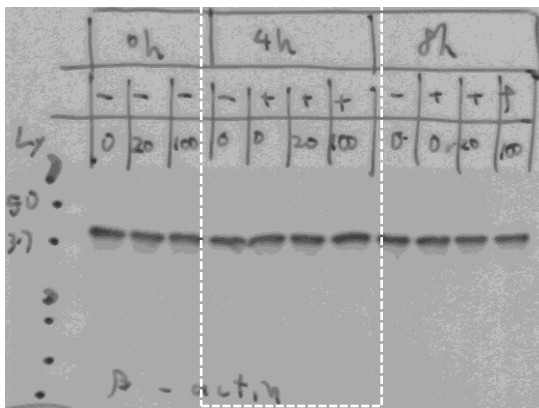

B-actin

**Fig. 3B**

**Primary human liver  
sinusoidal endothelial cells**

LY (nM)    0   0  20 100  
PA         -   +  +  +

**N2**

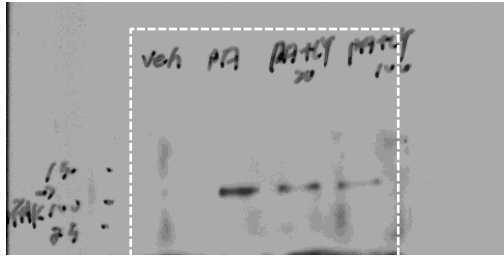

**p-FAK (Y397)**

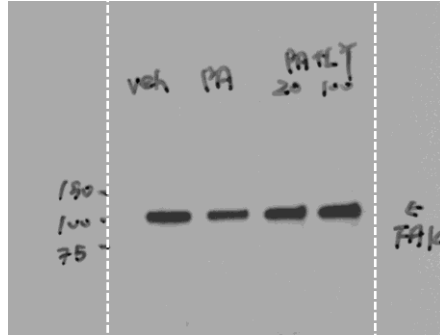

**FAK**

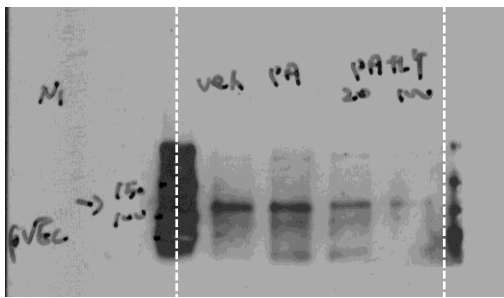

**p-VE-Cad  
(Y658)**

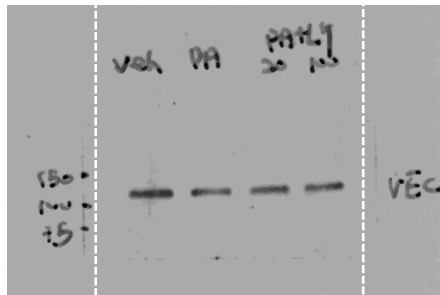

**VE-Cad**

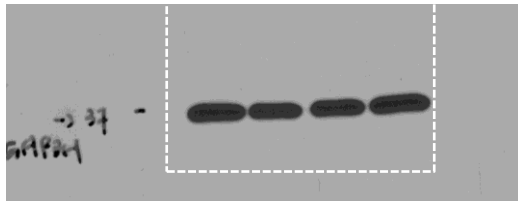

**GAPDH**

**Fig. 3B**

Primary human liver  
sinusoidal endothelial cells

| LY (nM) | 0 | 0 | 20 | 100 |
|---------|---|---|----|-----|
| PA      | - | + | +  | +   |

**N3**

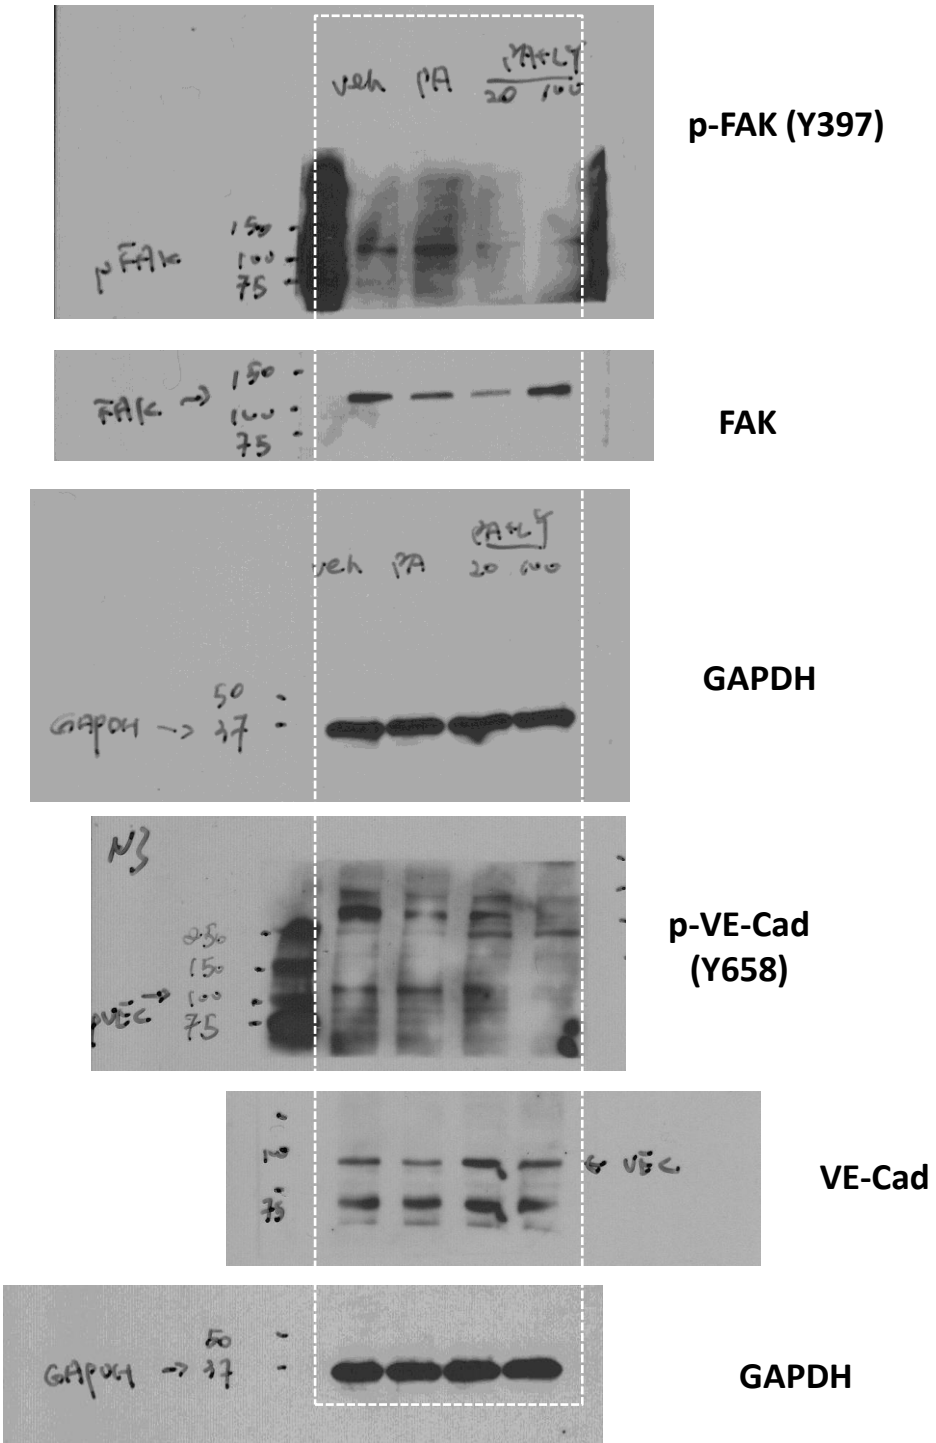

Supplement: mmc2.pdf [file mmc2.pdf]
